# Supplementary material for: Recombinant Protein Vaccines Formulated with Enantio-Specific Cationic Lipid R-DOTAP Induce Protective Cellular and Antibody-Mediated Immune Responses in Mice
Source: MDPI journal article supplement (doi:10.3390/v15020432), 2023-02-04
Supplement: s1 [file s1]

Supplementary Table S1: Particle size, polydispersity index (PDI) and zeta potential of R-DOTAP formulations.

| <b>Formulation</b>    | <b>Average particle<br/>Dia. (nm) <math>\pm</math> Stdev</b> | <b>PDI<br/>Average <math>\pm</math> Stdev</b> | <b><math>\zeta</math> Potential (mv)<br/>average <math>\pm</math> Stdev</b> |
|-----------------------|--------------------------------------------------------------|-----------------------------------------------|-----------------------------------------------------------------------------|
| R-DOTAP               | 152.87 $\pm$ 0.40                                            | 0.10 $\pm$ 0.01                               | 54.7 $\pm$ 2.10                                                             |
| COBRA-Y2. R-DOTAP     | 148.67 $\pm$ 0.70                                            | 0.13 $\pm$ 0.01                               | 45.90 $\pm$ 1.82                                                            |
| COBRA-NG2.R-DOTAP     | 147.90 $\pm$ 1.05                                            | 0.11 $\pm$ 0.01                               | 46.70 $\pm$ 1.31                                                            |
| COBRA-Y2.NG2. R-DOTAP | 148.2 $\pm$ 1.13                                             | 0.11 $\pm$ 0.00                               | 46.20 $\pm$ 0.10                                                            |

Supplementary Figure S1

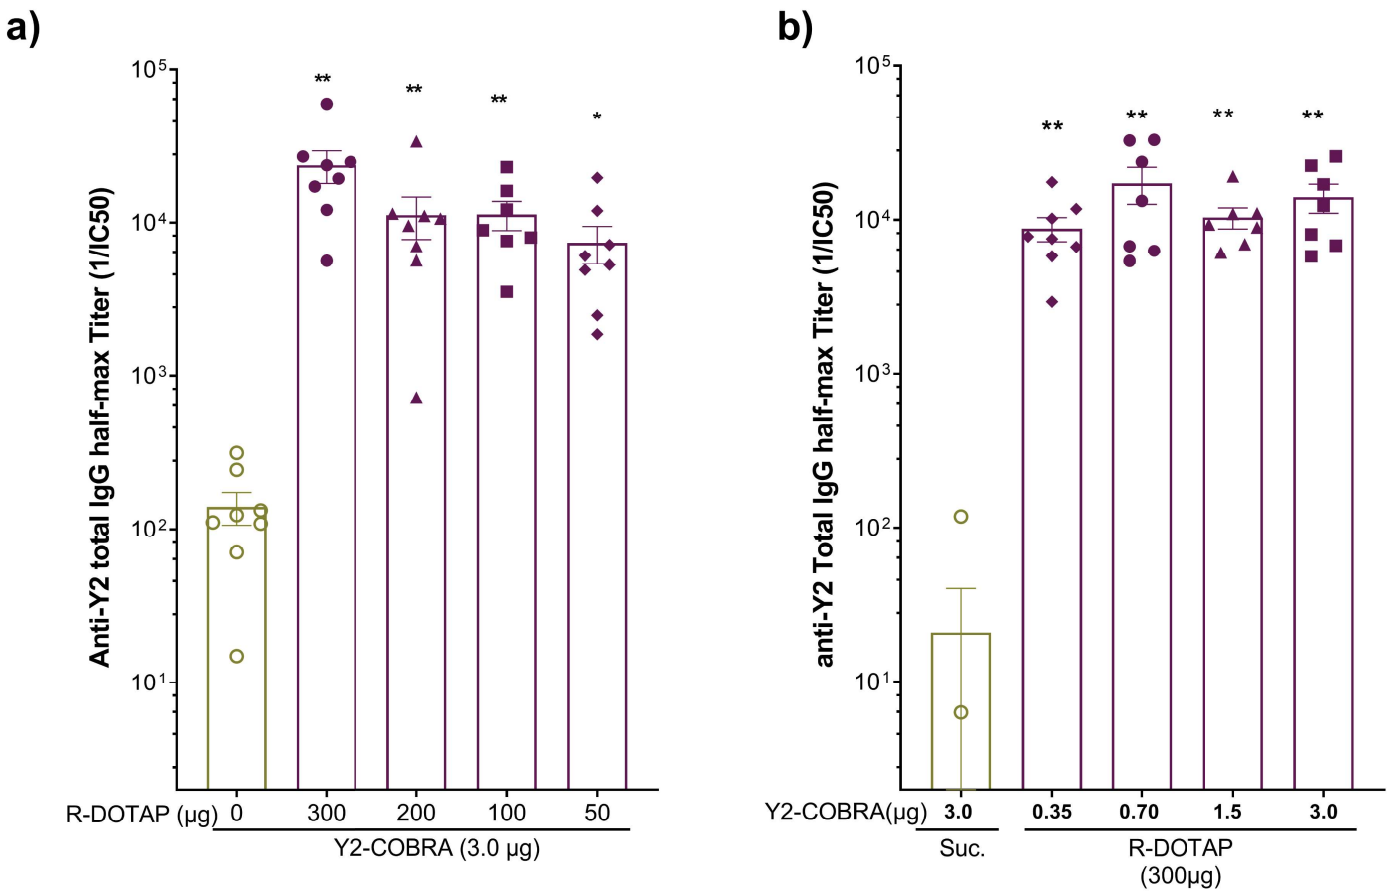

Supplement Figure S1: R-DOTAP is effective over a wide dose range and mediates dose-sparing of COBRA antigens. Groups of BALB/cJ (n=6-8) mice were immunized on day 0 and day 21 with 3µg of COBRA-Y2 protein and varying doses of R-DOTAP (a), or a 300 µg of R-DOTAP and varying doses of COBRA-Y2 protein or sucrose (Suc.) (b). Serum samples obtained from vaccinated mice on day 35 (14 days after the second dose) were measured for anti-COBRA-Y2 total IgG antibody by ELISA. Data represent mean ± SEM of half-max titers from each mouse. Comparisons between sucrose alone or R-DOTAP groups was performed using Student's t-test (unpaired-two tailed).\*\* P < 0.05

## Supplementary Figure S2

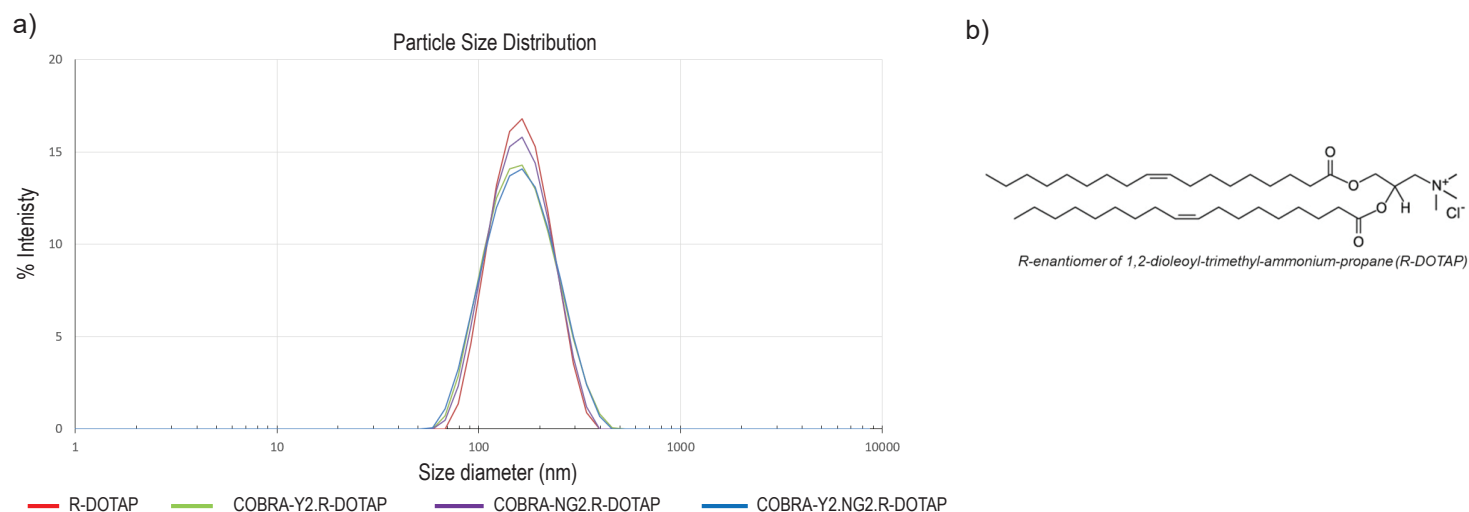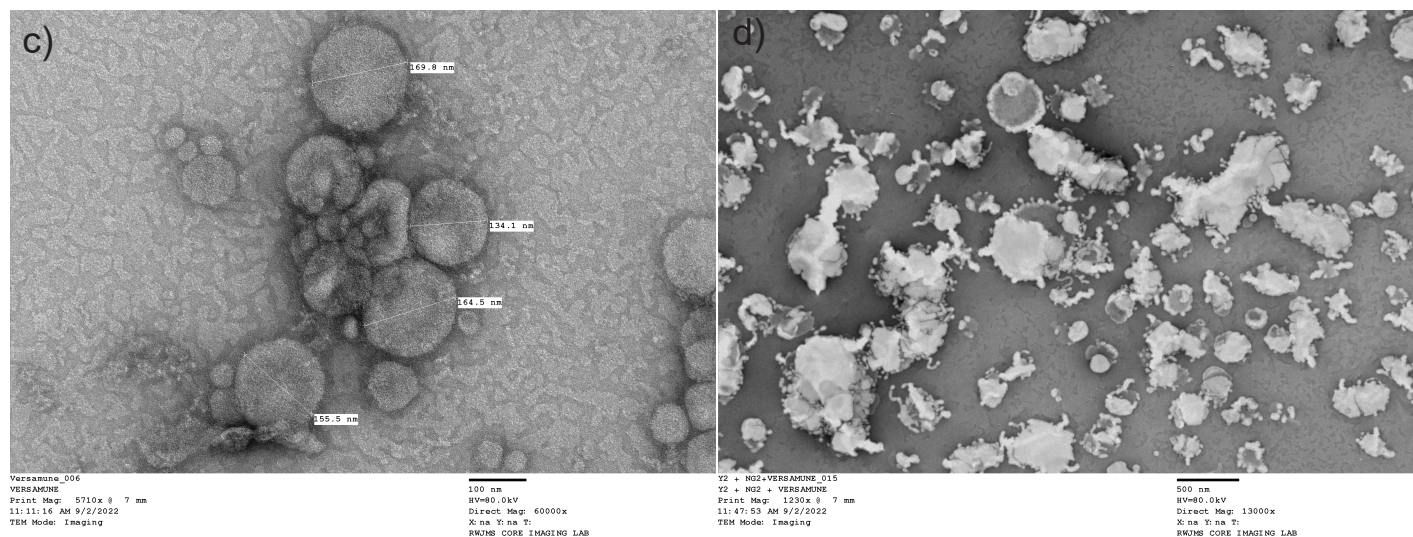

Supplementary Figure S2: Average particle size (a) for R-DOTAP liposomal nanoparticles and vaccine formulations containing R-DOTAP and protein antigens (COBRA-Y2, or COBRA-NG2, or both) were measured under indicated buffer conditions. Data presented are representative histograms of three independent measurements. b) Chemical structure of cationic lipid R-DOTAP (1,2-Dioleoyl-3-trimethylammonium propane). c-d) Representative TEM images of R-DOTAP nanoparticles or vaccine formulation (COBRA-Y2.NG2.R-DOTAP) containing R-DOTAP (c) and COBRA proteins mixtures (d).

Supplementary Figure S3 a)

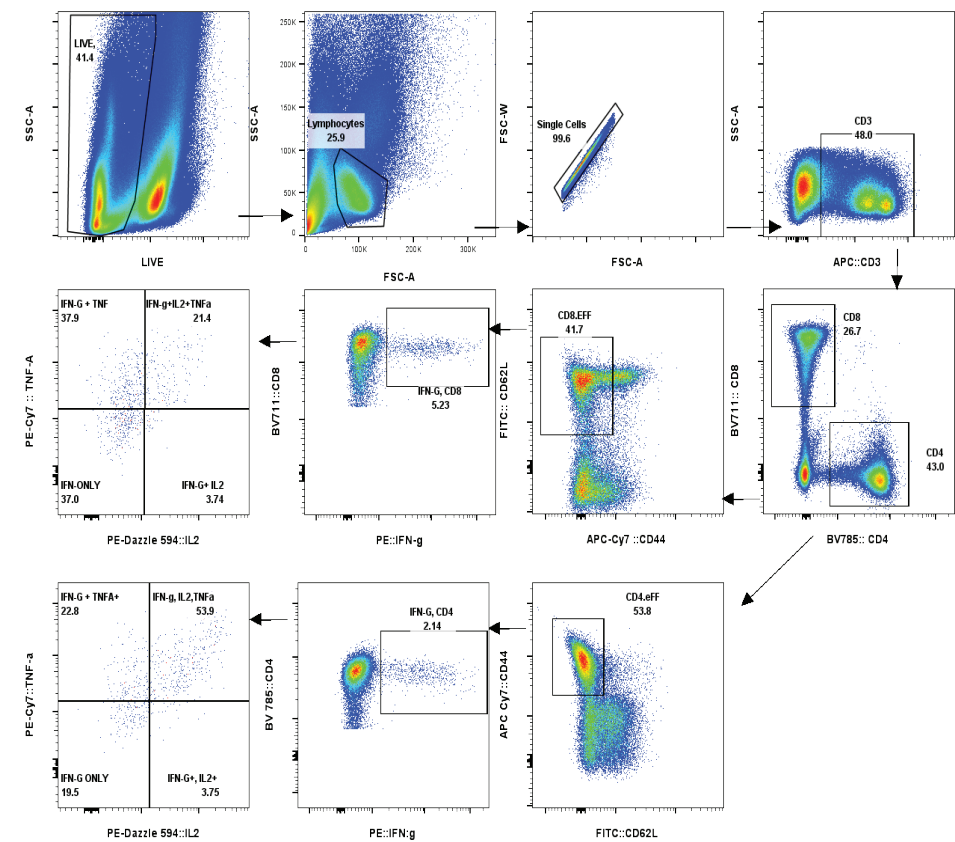

b)

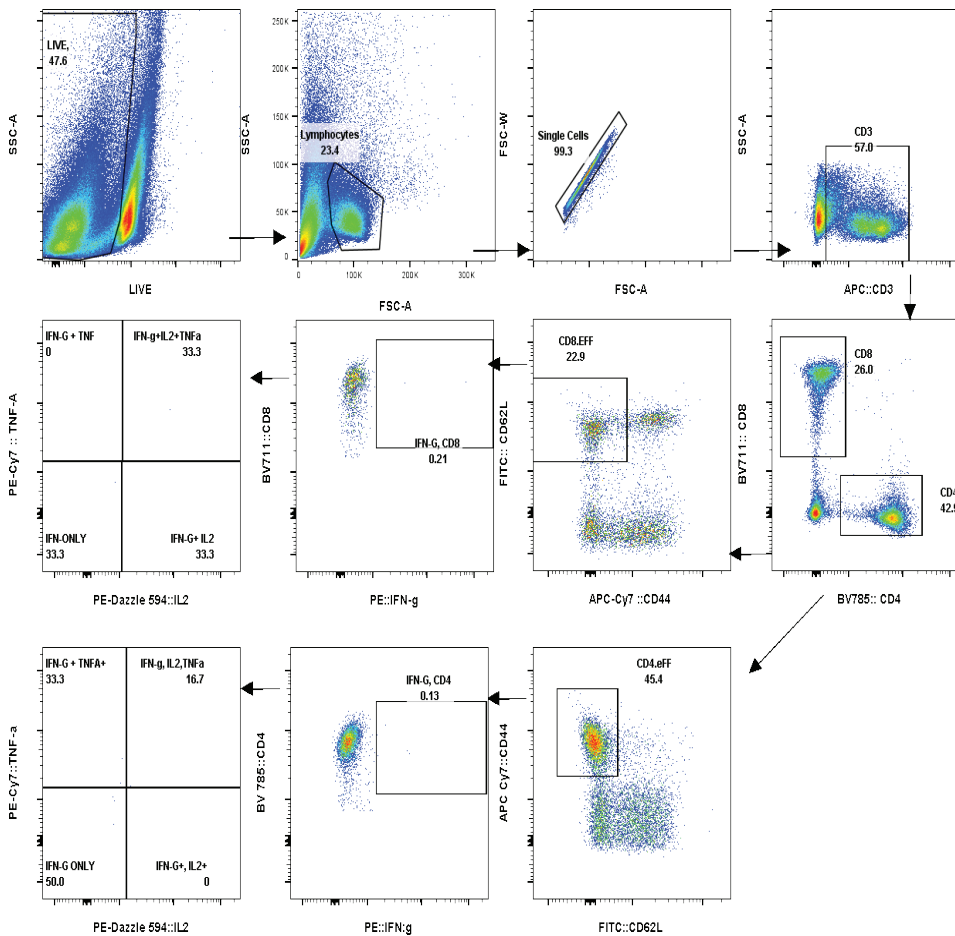

Supplement Figure S3: a) Representative flow gating scheme for figure 5. All gates for polyfunctional cytokine producing cells were drawn using fluorescence-minus-one controls to verify the lack of non-specific binding or bleed over from other antibodies/fluorochromes. Arrows indicate the gating strategy. CD44<sup>hi</sup> and CD62L<sup>low</sup> cells among CD4 and CD8 T cells were identified as effector cells. Polyfunctional cells in effector cells were gated first to identify IFN-gamma-producing cells and then separated into the four cytokine groups. b) The specificity of the cytokine production was further verified by staining un-stimulated cells which show no significant IFN gamma, IL-2, or TNF $\alpha$  staining. Gating on naïve cells also showed a lack of cytokine staining (not shown).
